# Supplementary material for: The likelihood ratios of FIB-4-values for diagnosing advanced liver fibrosis in patients with NAFLD
Source: publisher site journal article supplement (doi:10.1515/cclm-2023-0177), 2023-05-31
Supplement: Supplementary file 1 [file j_cclm-2023-0177_suppl_001.docx]

**Supplementary figure.** Receiver operating characteristic (ROC) curve for diagnosing advanced liver fibrosis in patients with NAFLD. The data points are read from Figure 2B in [1].
